# Supplementary material for: Effect of autohydrolysis and ionosolv treatments on eucalyptus fractionation and recovered lignin properties
Source: Royal Society of Chemistry journal article supplement (doi:10.1039/d2ra08013c), 2023-01-01
Supplement: d2ra08013c1.pdf [file d2ra08013c1.pdf]

## **Effect of autohydrolysis and ionosolv treatments on eucalyptus fractionation and recovered lignin properties**

Antonio Ovejero-Pérez\*, Victoria Rigual, Juan C. Domínguez, M. Virginia Alonso,  
Mercedes Oliet, and Francisco Rodriguez

Department of Chemical Engineering and Materials, Complutense University of  
Madrid, Av Complutense s/n, 28040, Madrid

\*Corresponding author: [antonioo@ucm.es](mailto:antonioo@ucm.es)

Number of figures: 2

Number of tables: 3

Number of pages: 6

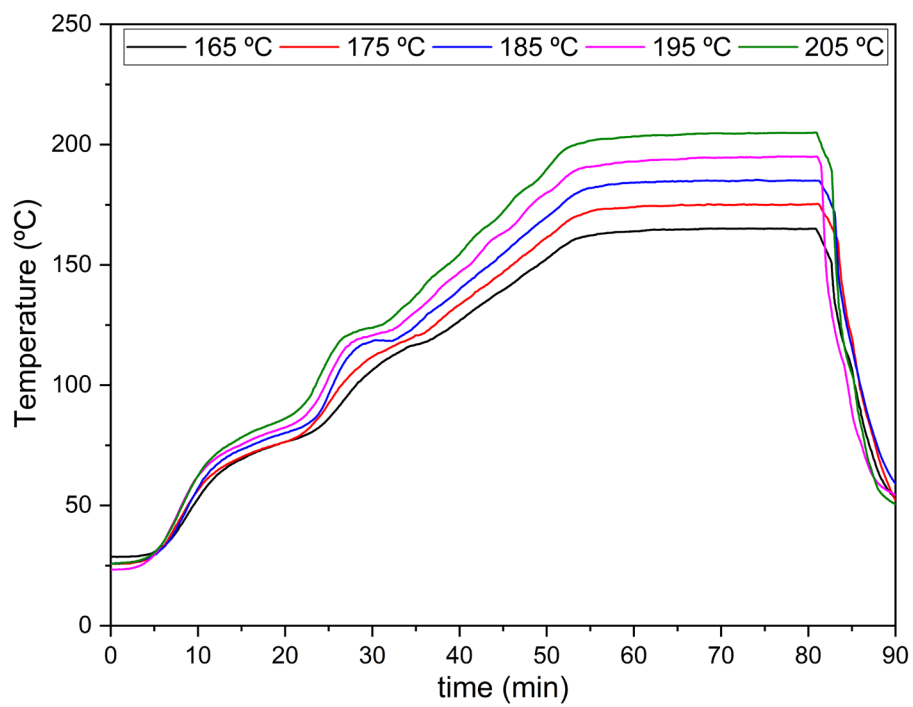

Figure S1. Temperature profiles of the autohydrolysis step.

Table S1. ANOVA table of the fractions' recovery responses. Values in red indicate not significant effects.

| Effect                  | Sum of squares | Degrees of freedom | Mean of squares | <i>P</i> |
|-------------------------|----------------|--------------------|-----------------|----------|
| Hemicelluloses recovery |                |                    |                 |          |
| $T_{AH}$                | 2708.48        | 1                  | 2708.48         | 0.0064   |
| $T_{AH}^2$              | 1555.98        | 1                  | 1555.98         | 0.0168   |
| Lack of fit             | 33.8113        | 2                  | 16.9056         | 0.9151   |
| Total error             | 398.31         | 4                  | 99.578          |          |
| Total                   | 4662.77        | 6                  |                 |          |
| Lignin recovery         |                |                    |                 |          |
| $T_{AH}$                | 38.4300        | 1                  | 38.4300         | 0.0925   |
| $t_{iono}$              | 674.0214       | 1                  | 674.0214        | 0.0130   |
| $T_{AH}^2$              | 0.0576         | 1                  | 0.0576          | 0.9639   |
| $t_{iono}^2$            | 18.7226        | 1                  | 18.7226         | 0.4412   |
| $T_{AH} \cdot t_{iono}$ | 16.5649        | 1                  | 16.5649         | 0.4661   |
| Lack of fit             | 77.3738        | 3                  | 25.7913         | 0.3521   |
| Total error             | 71.6598        | 3                  | 23.8866         |          |
| Total                   | 831.9779       | 9                  |                 |          |
| CRF recovery            |                |                    |                 |          |
| $T_{AH}$                | 5.8559         | 1                  | 5.8559          | 0.0981   |
| $t_{iono}$              | 123.8044       | 1                  | 123.8044        | 0.0107   |
| $T_{AH}^2$              | 6.0972         | 1                  | 6.0972          | 0.5417   |
| $t_{iono}^2$            | 51.4547        | 1                  | 51.4547         | 0.0510   |
| $T_{AH} \cdot t_{iono}$ | 0.1549         | 1                  | 0.1549          | 0.9198   |
| Lack of fit             | 20.2946        | 3                  | 6.7649          | 0.1039   |
| Total error             | 39.4082        | 3                  | 7.8816          |          |
| Total                   | 242.4996       | 9                  |                 |          |
| Lignin content in CRF   |                |                    |                 |          |
| $T_{AH}$                | 0.5613         | 1                  | 0.5613          | 0.6902   |
| $t_{iono}$              | 1.9503         | 1                  | 1.9503          | 0.0929   |
| $T_{AH}^2$              | 3.8446         | 1                  | 3.8446          | 0.3336   |
| $t_{iono}^2$            | 26.3314        | 1                  | 26.3314         | 0.0473   |
| $T_{AH} \cdot t_{iono}$ | 0.1849         | 1                  | 0.1849          | 0.8172   |
| Lack of fit             | 7.2293         | 2                  | 3.6147          | 0.0631   |
| Total error             | 8.7260         | 3                  | 2.9087          |          |
| Total                   | 54.3224        | 9                  |                 |          |

Table S2. Post autohydrolysis solid recovery and composition.

| T <sub>AH</sub> (°C) | t <sub>iono</sub> (h) | Solid recovery <sup>a</sup> | Lignin <sup>b</sup> | Glucan <sup>b</sup> | Hemicelluloses <sup>b</sup> |
|----------------------|-----------------------|-----------------------------|---------------------|---------------------|-----------------------------|
| 175                  | 1                     | 75.45                       | 35.17±0.01          | 58.84±0.26          | 5.48±0.38                   |
| 175                  | 5                     | 75.45                       | 35.17±0.01          | 58.84±0.26          | 5.48±0.38                   |
| 185                  | 3                     | 72.43                       | 34.84±2.85          | 60.17±0.48          | 4.77±1.45                   |
| 185                  | 3                     | 72.43                       | 34.84±2.85          | 60.17±0.48          | 4.77±1.45                   |
| 185                  | 3                     | 72.43                       | 34.84±2.85          | 60.17±0.48          | 4.77±1.45                   |
| 195                  | 1                     | 70.17                       | 35.66±0.69          | 63.74±0.51          | 1.77±0.09                   |
| 195                  | 5                     | 70.17                       | 35.66±0.69          | 63.74±0.51          | 1.77±0.09                   |
| 170.9                | 3                     | 77.64                       | 32.23±0.50          | 57.25±0.23          | 8.88±0.16                   |
| 199.1                | 3                     | 69.23                       | 34.91±0.32          | 69.16±0.18          | 0.83±0.07                   |
| 185                  | 0.17                  | 72.43                       | 34.84±2.85          | 60.17±0.48          | 4.77±1.45                   |
| 185                  | 5.83                  | 72.43                       | 34.84±2.85          | 60.17±0.48          | 4.77±1.45                   |

a: g recovered solid/100 g of eucalyptus

b: g compound/100 g recovered solid

Table S3. ANOVA table of the lignin properties responses. Values in red indicate not significant effects.

| Effect                              | Sum of squares         | Degrees of freedom | Mean of squares        | <i>P</i> |
|-------------------------------------|------------------------|--------------------|------------------------|----------|
| Mw                                  |                        |                    |                        |          |
| T <sub>AH</sub>                     | 1.38·10 <sup>8</sup>   | 1                  | 1.38·10 <sup>8</sup>   | 0.13602  |
| t <sub>iono</sub>                   | 1.83·10 <sup>9</sup>   | 1                  | 1.83·10 <sup>9</sup>   | 0.00517  |
| T <sub>AH</sub> <sup>2</sup>        | 3.59·10 <sup>7</sup>   | 1                  | 3.59·10 <sup>7</sup>   | 0.04738  |
| t <sub>iono</sub> <sup>2</sup>      | 3.86·10 <sup>8</sup>   | 1                  | 3.86·10 <sup>8</sup>   | 0.03295  |
| T <sub>AH</sub> · t <sub>iono</sub> | 2.02·10 <sup>8</sup>   | 1                  | 2.02·10 <sup>8</sup>   | 0.04157  |
| Lack of fit                         | 1.3541·10 <sup>8</sup> | 3                  | 4.5136·10 <sup>7</sup> | 0.1727   |
| Total error                         | 1.01·10 <sup>8</sup>   | 3                  | 3.37·10 <sup>7</sup>   |          |
| Total                               | 2.74·10 <sup>9</sup>   | 9                  |                        |          |
| PDI                                 |                        |                    |                        |          |
| T <sub>AH</sub>                     | 161.2021               | 1                  | 161.2021               | 0.3430   |
| t <sub>iono</sub>                   | 1775.6972              | 1                  | 1775.6972              | 0.0055   |
| T <sub>AH</sub> <sup>2</sup>        | 25.5346                | 1                  | 25.5346                | 0.6851   |
| t <sub>iono</sub> <sup>2</sup>      | 391.7245               | 1                  | 391.7245               | 0.0404   |
| T <sub>AH</sub> · t <sub>iono</sub> | 53.8022                | 1                  | 53.8022                | 0.5626   |
| Lack of fit                         | 374.6401               | 2                  | 187.3200               | 0.1516   |
| Total error                         | 383.1062               | 3                  | 127.7021               |          |
| Total                               | 2795.8832              | 9                  |                        |          |
| T <sub>D10%</sub>                   |                        |                    |                        |          |
| T <sub>AH</sub>                     | 1354.1656              | 1                  | 1354.1656              | 0.0131   |
| t <sub>iono</sub>                   | 355.8491               | 1                  | 355.8491               | 0.0428   |
| T <sub>AH</sub> <sup>2</sup>        | 0.0286                 | 1                  | 0.0286                 | 0.0421   |
| t <sub>iono</sub> <sup>2</sup>      | 3016.4461              | 1                  | 3016.4461              | 0.0042   |
| T <sub>AH</sub> · t <sub>iono</sub> | 676                    | 1                  | 676                    | 0.0333   |
| Lack of fit                         | 433.037                | 3                  | 433.037                | 0.0131   |
| Total error                         | 144.7106               | 3                  | 144.7106               |          |
| Total                               | 5944.1                 | 9                  |                        |          |

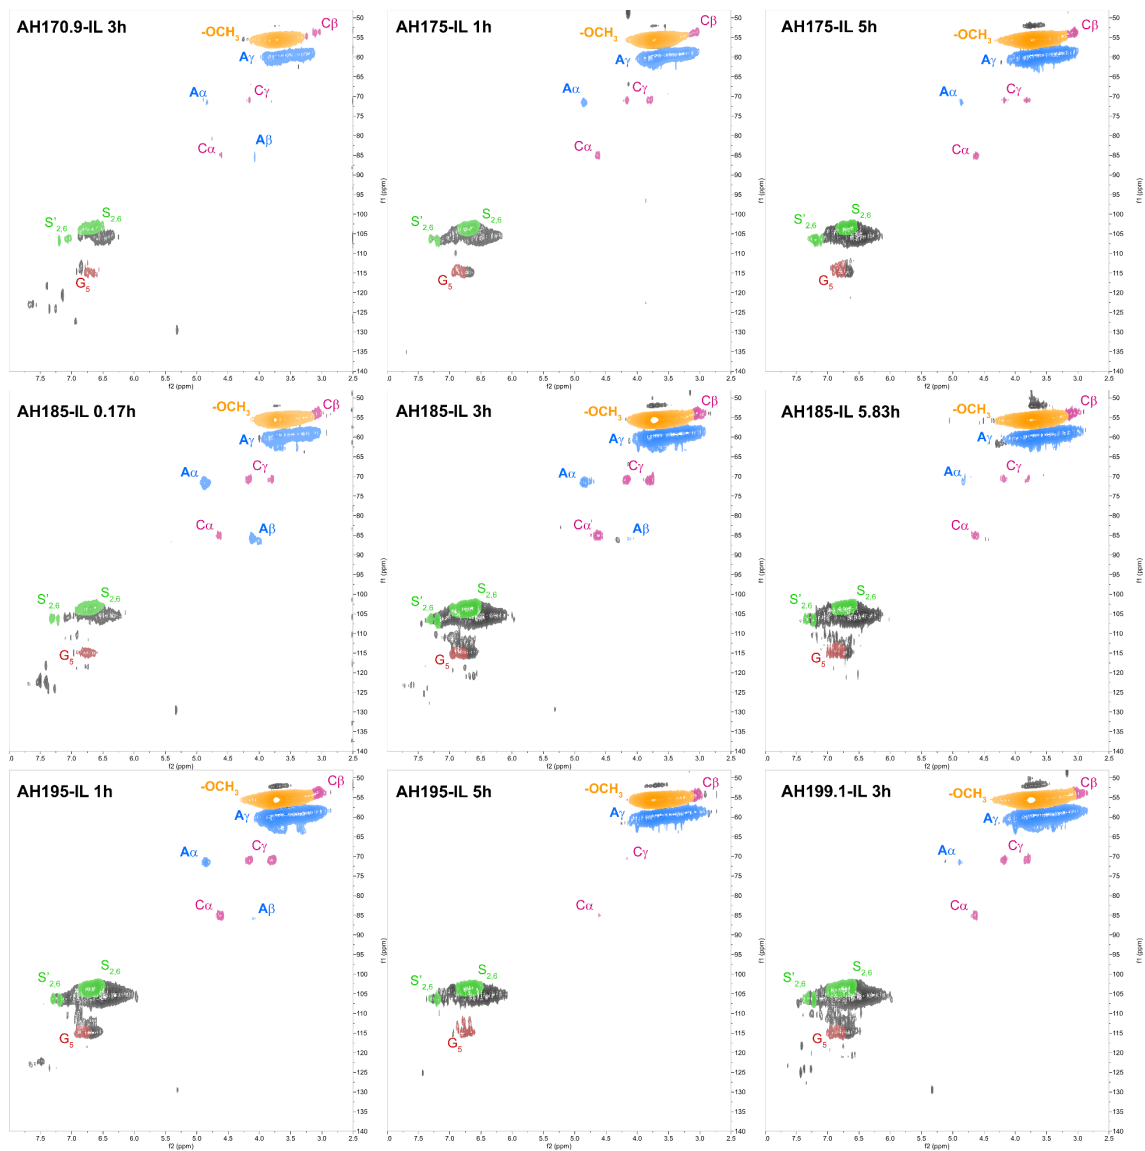

Figure S2. HSQC-NMR spectra of the recovered lignins by the autohydrolysis+ionosolv process combination.
